# Supplementary material for: Fabrication of two 2D Cu-based coordination polymers via a secondary ligand adjustment and a derived Cu/Cu2O heterojunction for an enhanced dye removal capacity
Source: Royal Society of Chemistry journal article supplement (doi:10.1039/d3ce00684k), 2023-01-01
Supplement: d3ce00684k1.pdf [file d3ce00684k1.pdf]

## Supporting Information

### Fabrication of two 2D Cu-based coordination polymers via secondary ligand adjustment and derived Cu/Cu<sub>2</sub>O heterojunction for enhanced dye removal capacity

Wen-Ze Li,<sup>a</sup> Jing Li,<sup>a</sup> Hong-Tian Zhao,<sup>a</sup> Xiao-Sa Zhang,<sup>a</sup> Yu Liu,<sup>a</sup> Zhi-Tong Liu,<sup>a</sup>

Hong-Xin Fu<sup>a</sup> and Jian Luan<sup>b\*</sup>

<sup>a</sup> College of Science, Shenyang University of Chemical Technology, Shenyang, 110142, P. R. China

<sup>b</sup> College of Sciences, Northeastern University, Shenyang, 110819, P. R. China

E-mail: [2010044@stu.neu.edu.cn](mailto:2010044@stu.neu.edu.cn) (J. Luan)

**Table S1** Crystallographic data for Cu-CPs.

| Complex                                                         | Cu-CP-1                                                         | Cu-CP-2                                                         |
|-----------------------------------------------------------------|-----------------------------------------------------------------|-----------------------------------------------------------------|
| Formula                                                         | C <sub>16</sub> H <sub>14</sub> CuN <sub>4</sub> O <sub>6</sub> | C <sub>20</sub> H <sub>14</sub> CuN <sub>4</sub> O <sub>6</sub> |
| Formula wt                                                      | 421.85                                                          | 469.89                                                          |
| Crystal system                                                  | Monoclinic                                                      | Monoclinic                                                      |
| Space group                                                     | <i>P</i> 21/ <i>c</i>                                           | <i>P</i> 21/ <i>c</i>                                           |
| <i>T</i> (K)                                                    | 296(2)                                                          | 296(2)                                                          |
| <i>a</i> (Å)                                                    | 5.5038(3)                                                       | 9.7910(15)                                                      |
| <i>b</i> (Å)                                                    | 15.3084(9)                                                      | 6.3116(10)                                                      |
| <i>c</i> (Å)                                                    | 9.9468(6)                                                       | 28.379(4)                                                       |
| $\alpha$ (°)                                                    | 90                                                              | 90                                                              |
| $\beta$ (°)                                                     | 92.580(2)                                                       | 93.082(4)                                                       |
| $\gamma$ (°)                                                    | 90                                                              | 90                                                              |
| <i>V</i> (Å <sup>3</sup> )                                      | 837.21(8)                                                       | 1751.2(5)                                                       |
| <i>Z</i>                                                        | 2                                                               | 4                                                               |
| <i>D</i> <sub>calc</sub> (g cm <sup>-3</sup> )                  | 1.673                                                           | 1.782                                                           |
| <i>F</i> (000)                                                  | 430                                                             | 956                                                             |
| $\theta$ <sub>max</sub> (°)                                     | 25.06                                                           | 28.35                                                           |
| <i>R</i> <sub>int</sub>                                         | 0.0366                                                          | 0.1119                                                          |
| <i>R</i> <sub>1</sub> <sup>a</sup> [ <i>I</i> > 2σ( <i>I</i> )] | 0.0398                                                          | 0.0608                                                          |
| w <i>R</i> <sub>2</sub> <sup>b</sup> (all data)                 | 0.0806                                                          | 0.1214                                                          |
| GOF                                                             | 1.011                                                           | 1.000                                                           |

<sup>a</sup>  $R_1 = \Sigma||F_o| - |F_c|| / \Sigma|F_o|$ , <sup>b</sup>  $wR_2 = \Sigma[w(F_o^2 - F_c^2)^2] / \Sigma[w(F_o^2)^2]^{1/2}$ .

**Table S2** Selected bond distances (Å) and angles (°) for **Cu-CP-1**.

|                     |            |                     |           |
|---------------------|------------|---------------------|-----------|
| Cu(1)–O(1)#1        | 1.966(2)   | Cu(1)–O(1)          | 1.966(2)  |
| Cu(1)–N(1)#1        | 2.114(3)   | Cu(1)–N(1)          | 2.114(3)  |
| Cu(1)–O(2)#2        | 2.291(2)   | Cu(1)–O(2)#3        | 2.291(2)  |
| O(1)#1–Cu(1)–O(1)   | 180        | O(1)#1–Cu(1)–N(1)#1 | 90.82(10) |
| O(1)–Cu(1)–N(1)#1   | 89.18(10)  | O(1)#1–Cu(1)–N(1)   | 89.18(10) |
| O(1)–Cu(1)–N(1)     | 90.82(10)  | N(1)#1–Cu(1)–N(1)   | 180       |
| O(1)#1–Cu(1)–O(2)#2 | 78.69(8)   | O(1)–Cu(1)–O(2)#2   | 101.31(8) |
| N(1)#1–Cu(1)–O(2)#2 | 90.56(9)   | N(1)–Cu(1)–O(2)#2   | 89.44(9)  |
| O(1)#1–Cu(1)–O(2)#3 | 101.31(8)  | O(1)–Cu(1)–O(2)#3   | 78.69(8)  |
| N(1)#1–Cu(1)–O(2)#3 | 89.44(9)   | N(1)–Cu(1)–O(2)#3   | 90.55(9)  |
| O(2)#2–Cu(1)–O(2)#3 | 179.998(1) |                     |           |

Symmetry codes: #1  $-x + 1, -y, -z + 1$ ; #2  $x - 1, y, z$ ; #3  $-x + 2, -y, -z + 1$ .

**Table S3** Selected bond distances (Å) and angles (°) for **Cu-CP-2**.

|                     |            |                   |            |
|---------------------|------------|-------------------|------------|
| Cu(1)–O(3)          | 1.929(3)   | Cu(1)–O(1)        | 1.959(3)   |
| Cu(1)–N(1)          | 2.000(3)   | Cu(1)–N(2)#1      | 2.005(4)   |
| Cu(1)–O(2)#2        | 2.353(3)   | O(3)–Cu(1)–O(1)   | 84.54(13)  |
| O(3)–Cu(1)–N(1)     | 88.61(13)  | O(1)–Cu(1)–N(1)   | 171.05(14) |
| O(3)–Cu(1)–N(2)#1   | 166.52(14) | O(1)–Cu(1)–N(2)#1 | 93.40(14)  |
| N(1)–Cu(1)–N(2)#1   | 91.92(14)  | O(3)–Cu(1)–O(2)#2 | 94.41(12)  |
| O(1)–Cu(1)–O(2)#2   | 94.47(12)  | N(1)–Cu(1)–O(2)#2 | 91.78(13)  |
| N(2)#1–Cu(1)–O(2)#2 | 99.04(13)  |                   |            |

Symmetry codes: #1  $-x + 1, -y - 1, -z + 1$ ; #2  $-x, y - 1/2, -z + 1/2$ .

**Table S4** Table of distributions of element contents by SEM-EDX for the materials.

| Material           | Cu (wt%) | C (wt%) | O (wt%) | N (wt%) | S (wt%) |
|--------------------|----------|---------|---------|---------|---------|
| <b>Cu-CP-1-800</b> | 93.82    | 4.28    | 1.90    | —       | —       |
| <b>Cu-CP-2-800</b> | 71.99    | 17.74   | 10.27   | —       | —       |
| <b>Cu@C-1</b>      | 69.95    | 26.75   | 3.30    | —       | —       |
| <b>Cu@C-2</b>      | 44.28    | 53.03   | 2.69    | —       | —       |
| <b>Cu@N-1</b>      | 56.58    | 38.09   | 5.33    | —       | —       |
| <b>Cu@N-2</b>      | 42.41    | 47.71   | 9.88    | —       | —       |
| <b>Cu@S-1</b>      | 68.22    | 28.32   | 3.46    | —       | —       |
| <b>Cu@S-2</b>      | 46.91    | 49.65   | 3.44    | —       | —       |

**Table S5** Organic dyes with different charge types and sizes.

| Dye                    | Formula | Charge type | Size (nm × nm × nm) |
|------------------------|---------|-------------|---------------------|
| Methylene Blue<br>(MB) |         | Cationic    | 0.40 × 0.79 × 1.63  |
| Rhodamine B<br>(RhB)   |         | Cationic    | 0.68 × 1.18 × 1.57  |
| Methyl Orange<br>(MO)  |         | Anionic     | 0.53 × 0.73 × 1.74  |
| Congo Red<br>(CR)      |         | Anionic     | 0.39 × 0.86 × 2.61  |

**Table S6** List of zeta potential values of the samples.

| Material                  | Cu-CP-1 | Cu@C-1 | Cu@N-1 | Cu@S-1 | Cu-CP-2 | Cu@C-2 | Cu@S-2 | Cu@S-2 |
|---------------------------|---------|--------|--------|--------|---------|--------|--------|--------|
| Zeta potential value (mV) | 2.97    | -0.10  | -0.46  | 0.70   | 1.23    | -0.23  | -1.60  | 0.21   |

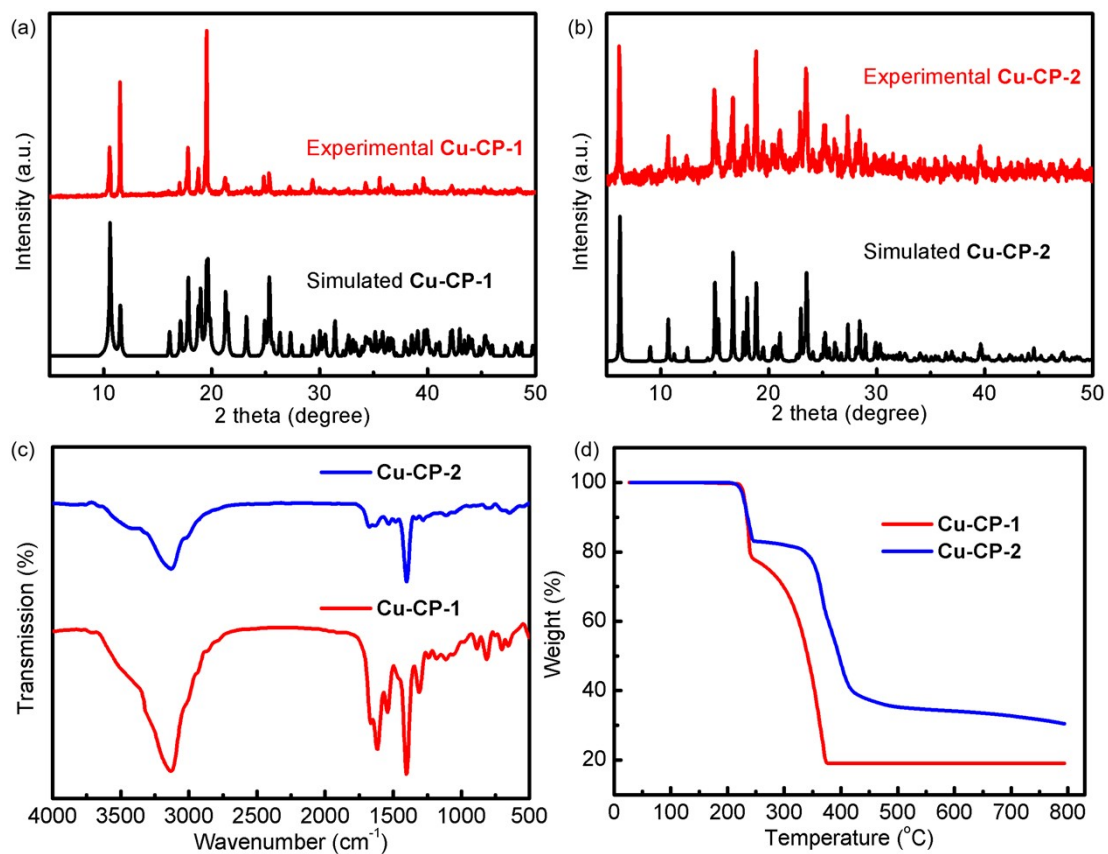

**Fig. S1** (a) The PXR D patterns of simulated and fresh sample for **Cu-CP-1**; (b) The PXR D patterns of simulated and fresh sample for **Cu-CP-2**; (c) The IR spectra of **Cu-CP-1** and **Cu-CP-2**; (d) The TG curve of **Cu-CP-1** and **Cu-CP-2**.

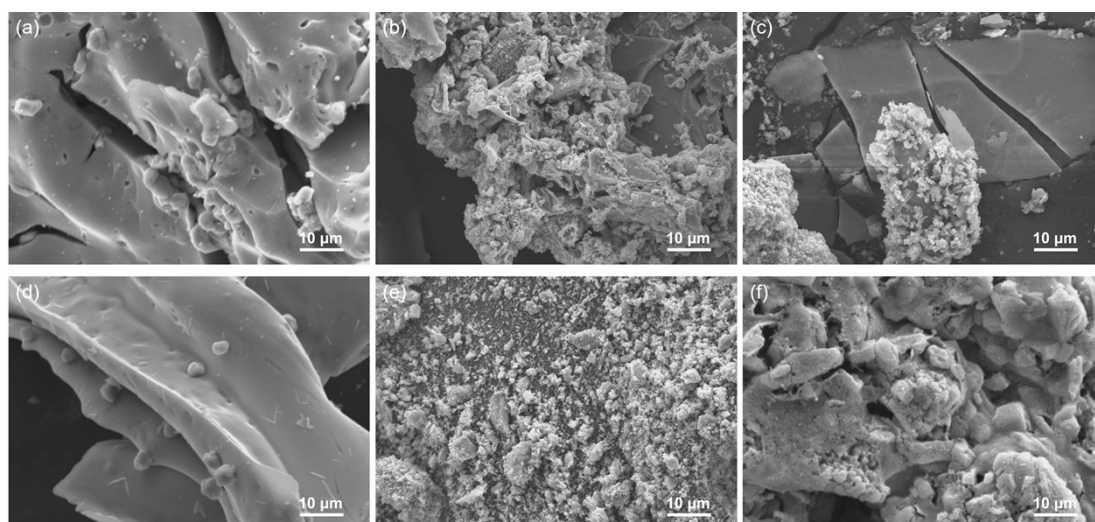

**Fig. S2** Typical SEM images of **Cu@C-1** (a), **Cu@N-1** (b), **Cu@S-1** (c), **Cu@C-2** (d), **Cu@N-2** (e), and **Cu@S-2** (f).

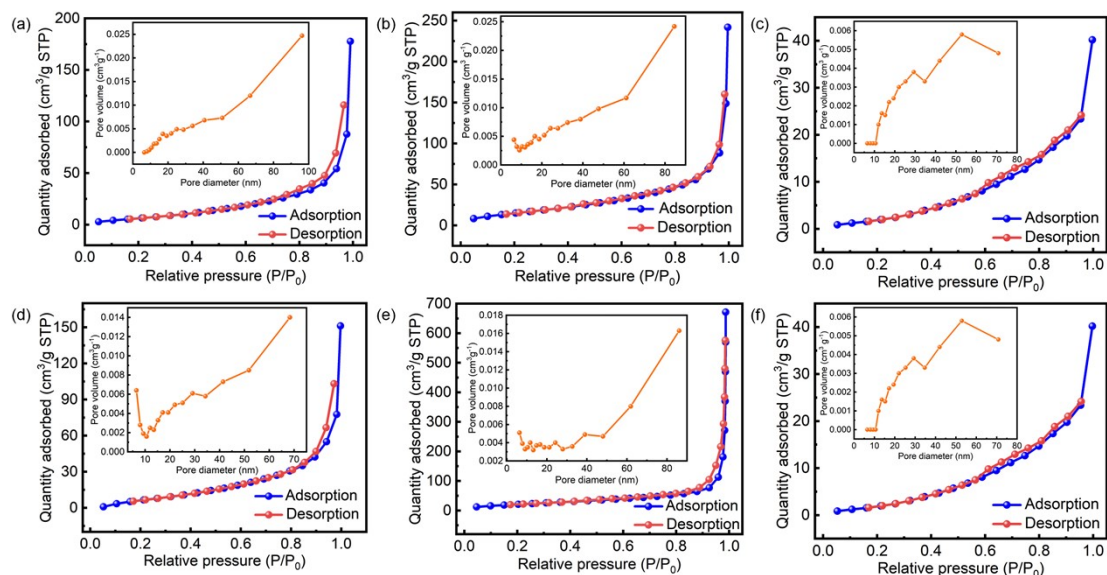

**Fig. S3** Nitrogen adsorption and desorption isotherms (inset: the pore size distribution) of Cu@C-1 (a), Cu@N-1 (b), Cu@S-1 (c), Cu@C-2 (d), Cu@N-2 (e), and Cu@S-2 (f).

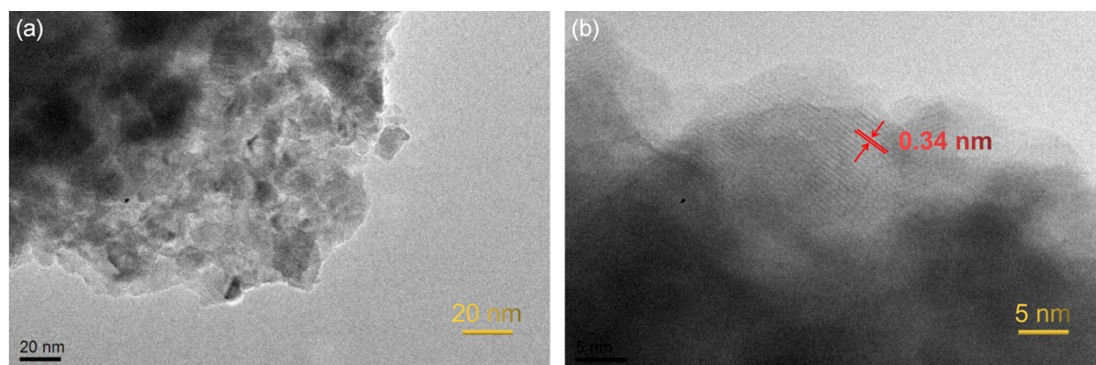

**Fig. S4** Typical HRTEM images of Cu@N-2: (a) Lower magnification; (b) Higher magnification..

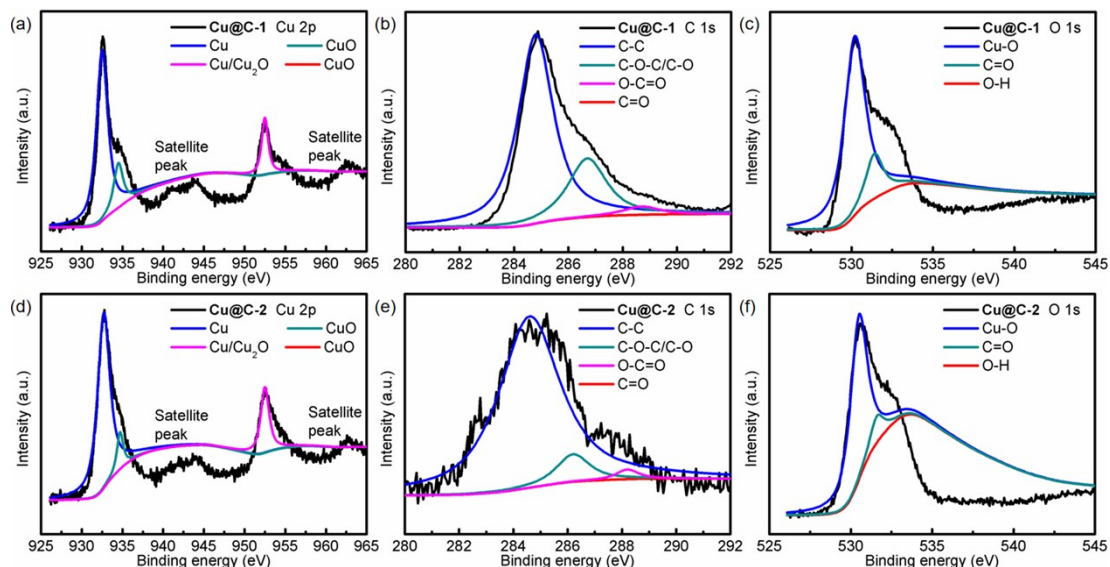

**Fig. S5** XPS analysis of the Cu 2p (a), C 1s (b) and O 1s (c) spectra of **Cu@C-1**. XPS analysis of the Cu 2p (d), C 1s (e) and O 1s (f) spectra of **Cu@C-2**.

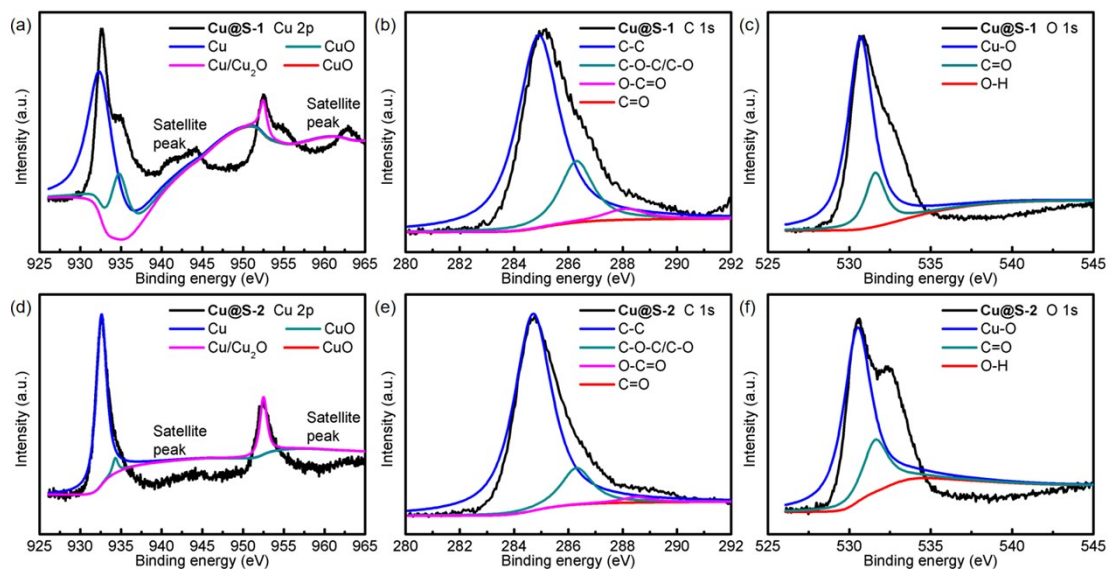

**Fig. S6** XPS analysis of the Cu 2p (a), C 1s (b) and O 1s (c) spectra of **Cu@S-1**. XPS analysis of the Cu 2p (d), C 1s (e) and O 1s (f) spectra of **Cu@S-2**.



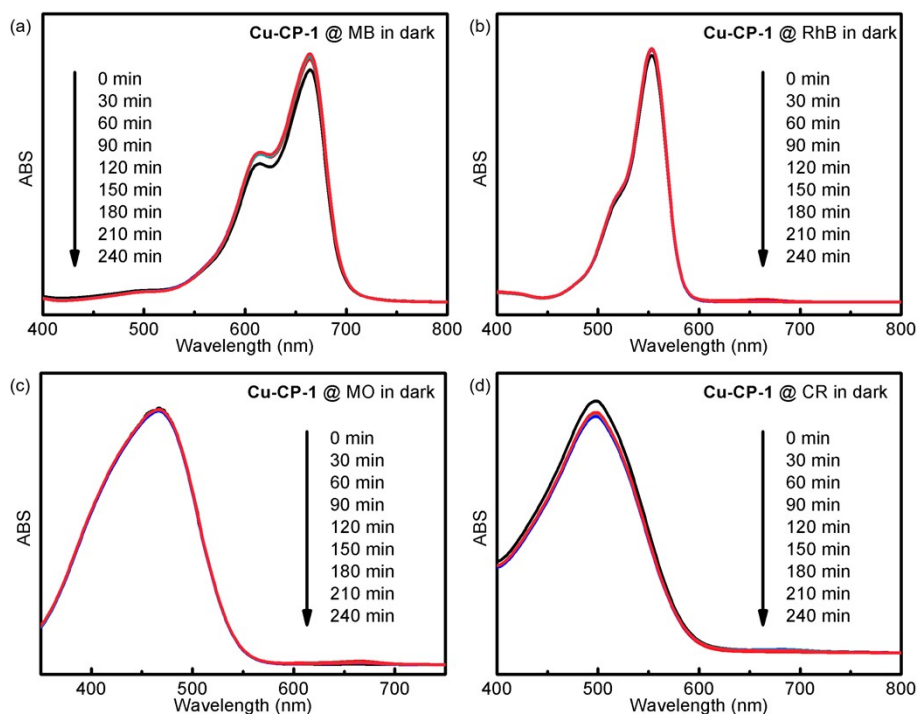

**Fig. S7** UV-vis spectra of MB (a), RhB (b), MO (c) and CR (d) solutions recorded after different adsorption times with **Cu-CP-1**.

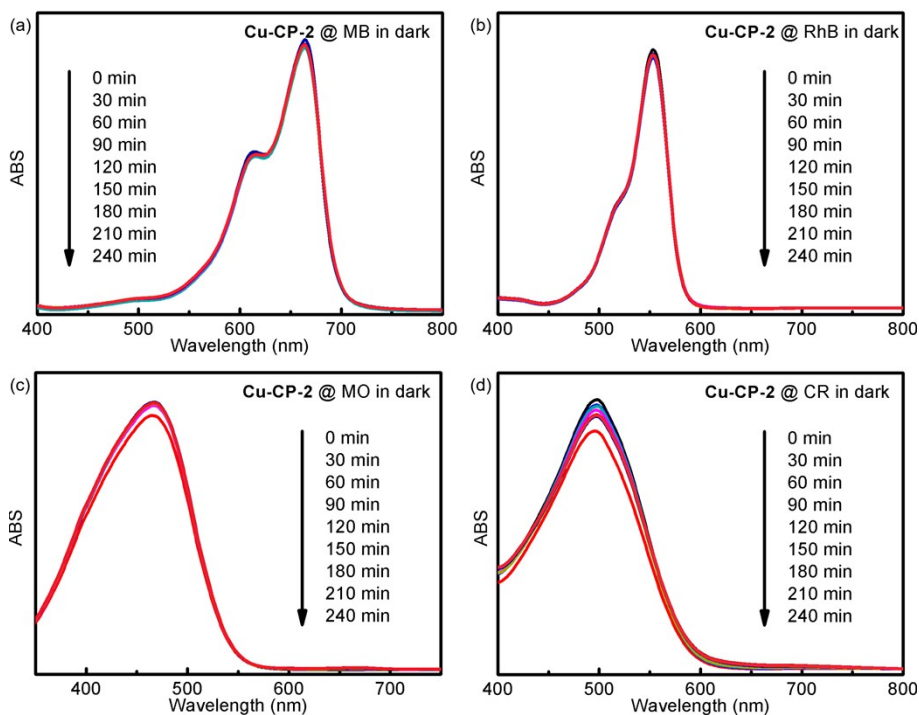

**Fig. S8** UV-vis spectra of MB (a), RhB (b), MO (c) and CR (d) solutions recorded after different adsorption times with **Cu-CP-2**.

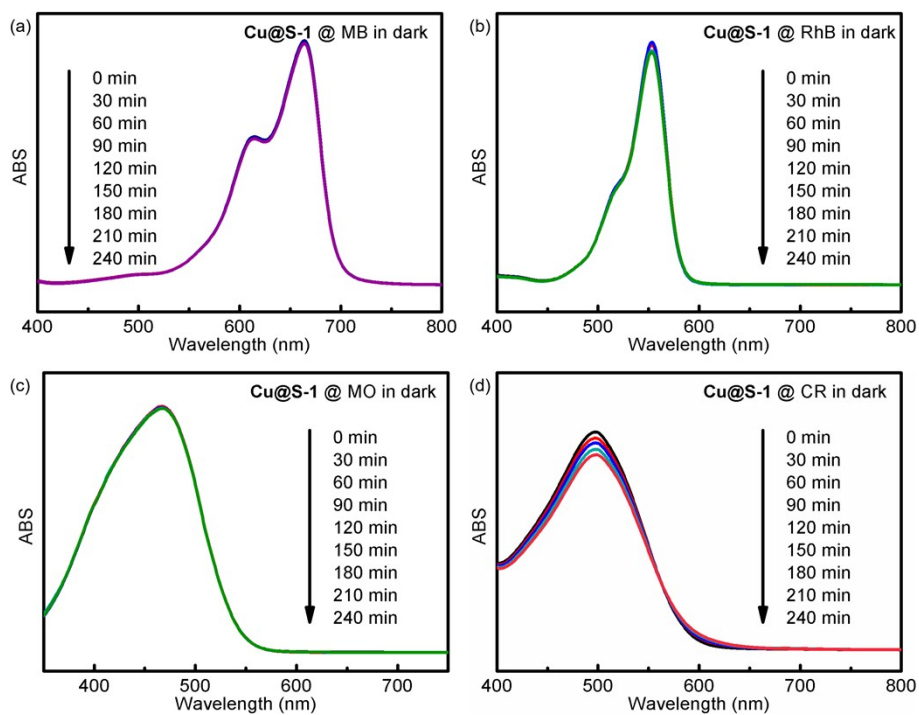

**Fig. S9** UV-vis spectra of MB (a), RhB (b), MO (c) and CR (d) solutions recorded after different adsorption times with Cu@S-1.

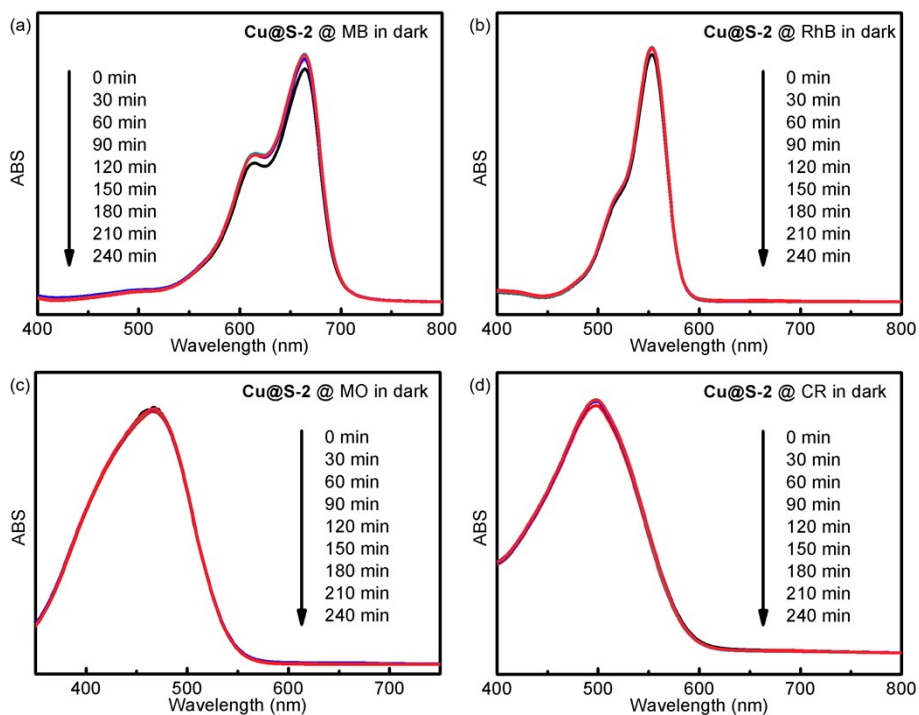

**Fig. S10** UV-vis spectra of MB (a), RhB (b), MO (c) and CR (d) solutions recorded after different adsorption times with Cu@S-2.



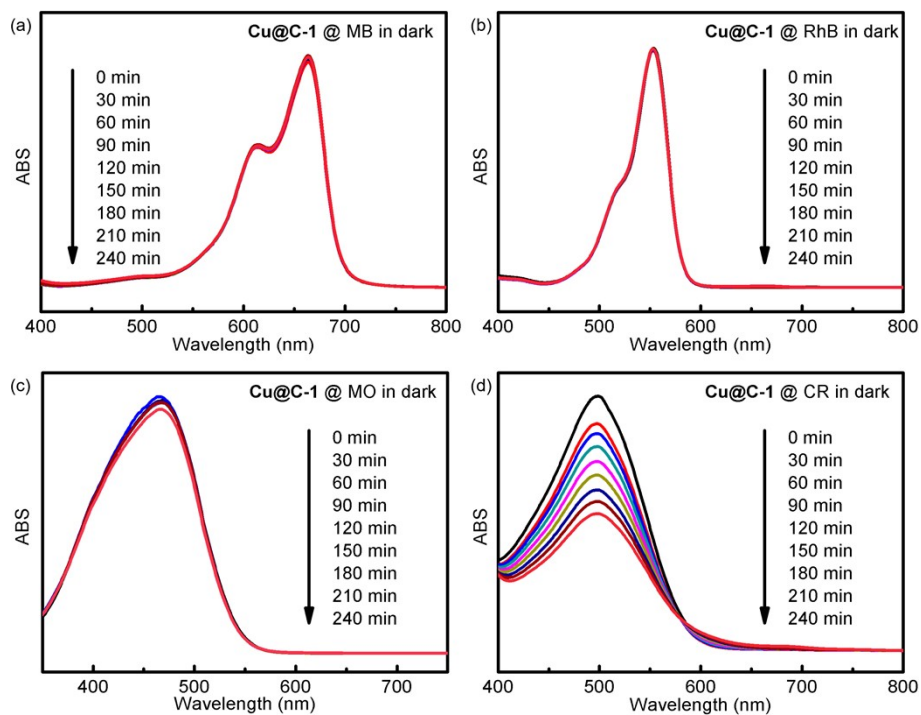

**Fig. S11** UV-vis spectra of MB (a), RhB (b), MO (c) and CR (d) solutions recorded after different adsorption times with Cu@C-1.

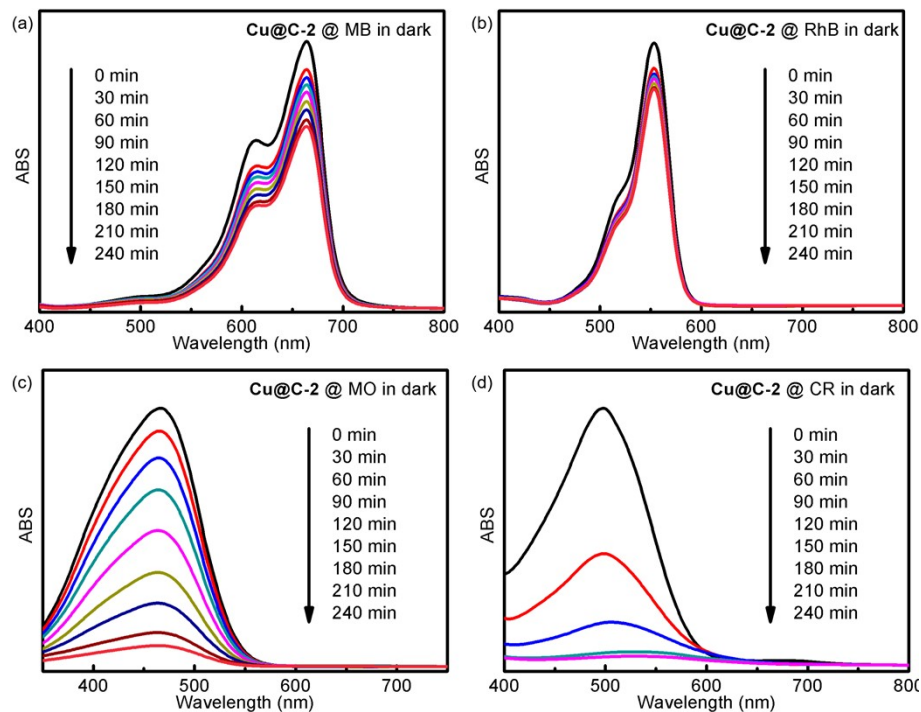

**Fig. S12** UV-vis spectra of MB (a), RhB (b), MO (c) and CR (d) solutions recorded after different adsorption times with Cu@C-2.

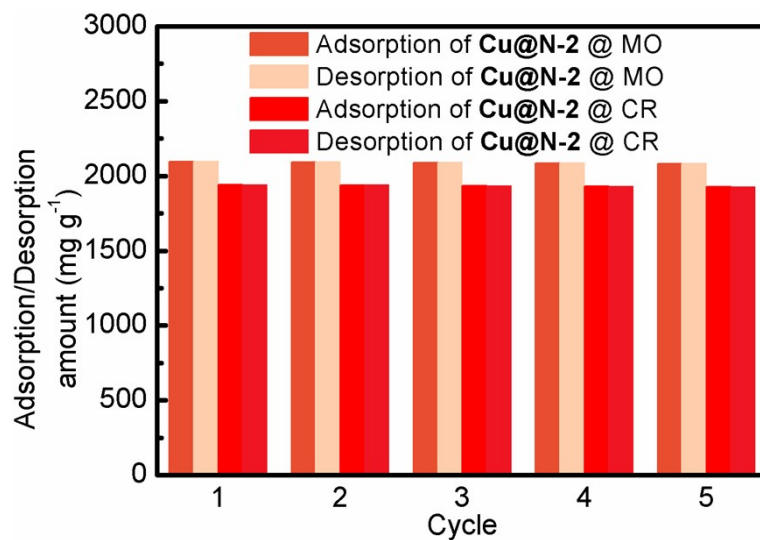

**Fig. S13** The cycling stability of the adsorption/desorption of dyes on the Cu@N-2.

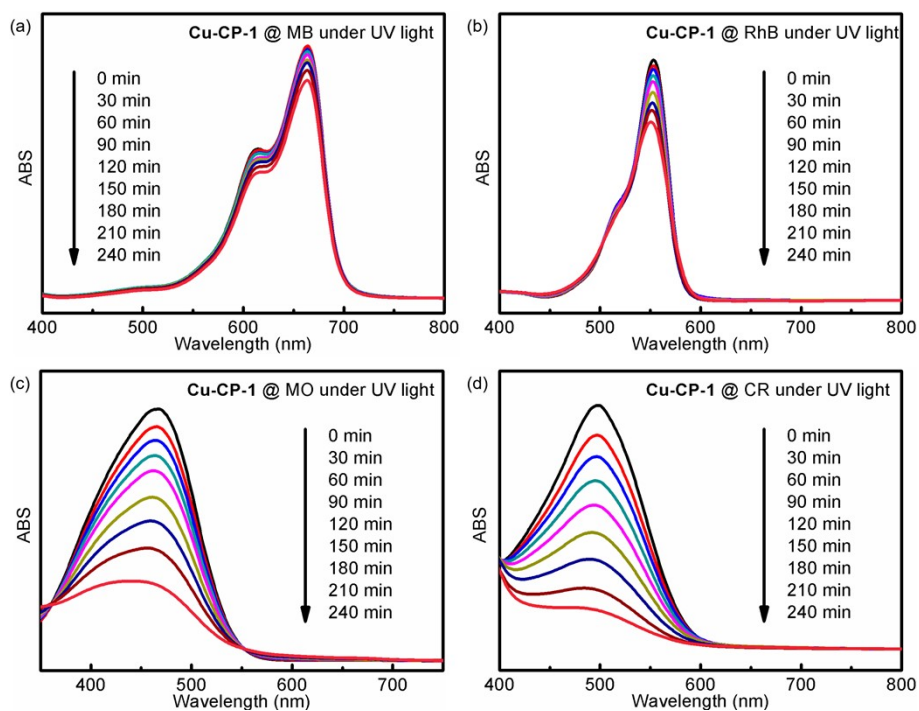

**Fig. S14** UV-vis spectra of MB (a), RhB (b), MO (c) and CR (d) solutions recorded after different photocatalytic degradation times with Cu-CP-1.

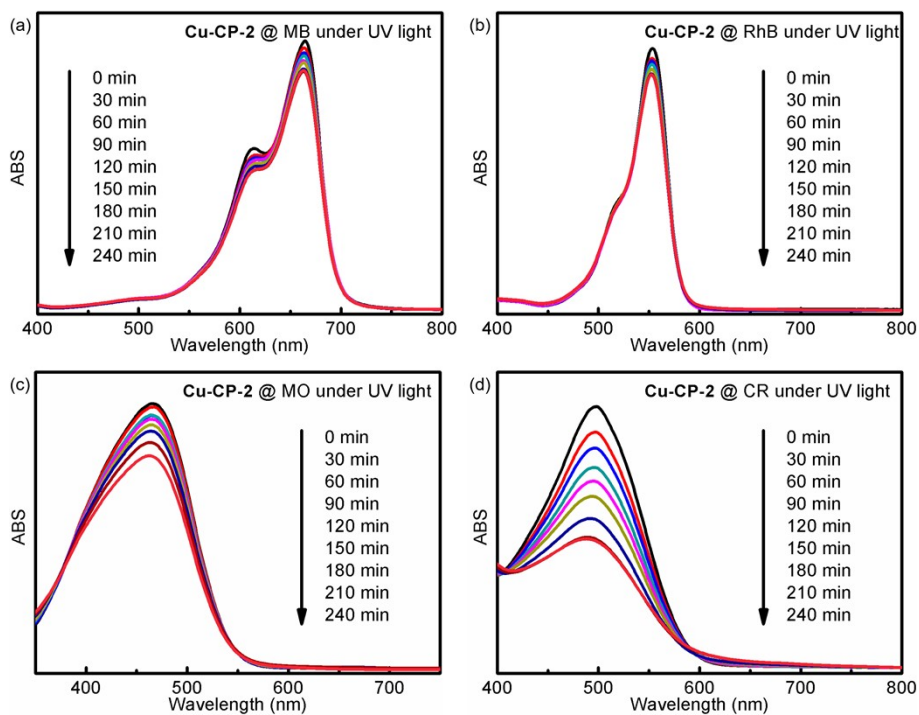

**Fig. S15** UV-vis spectra of MB (a), RhB (b), MO (c) and CR (d) solutions recorded after different photocatalytic degradation times with **Cu-CP-2**.

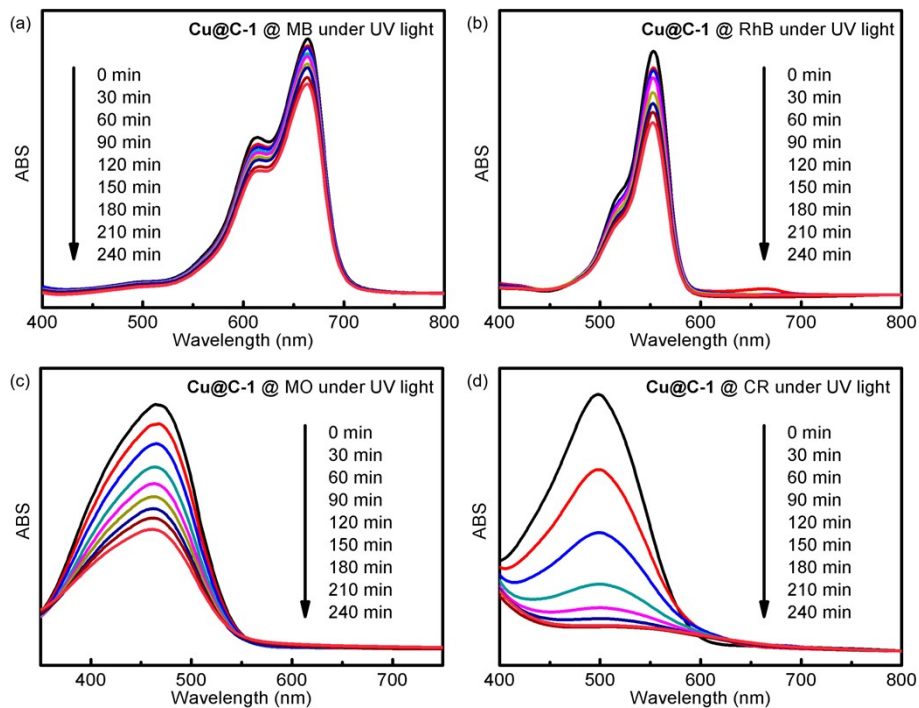

**Fig. S16** UV-vis spectra of MB (a), RhB (b), MO (c) and CR (d) solutions recorded after different photocatalytic degradation times with **Cu@C-1**.

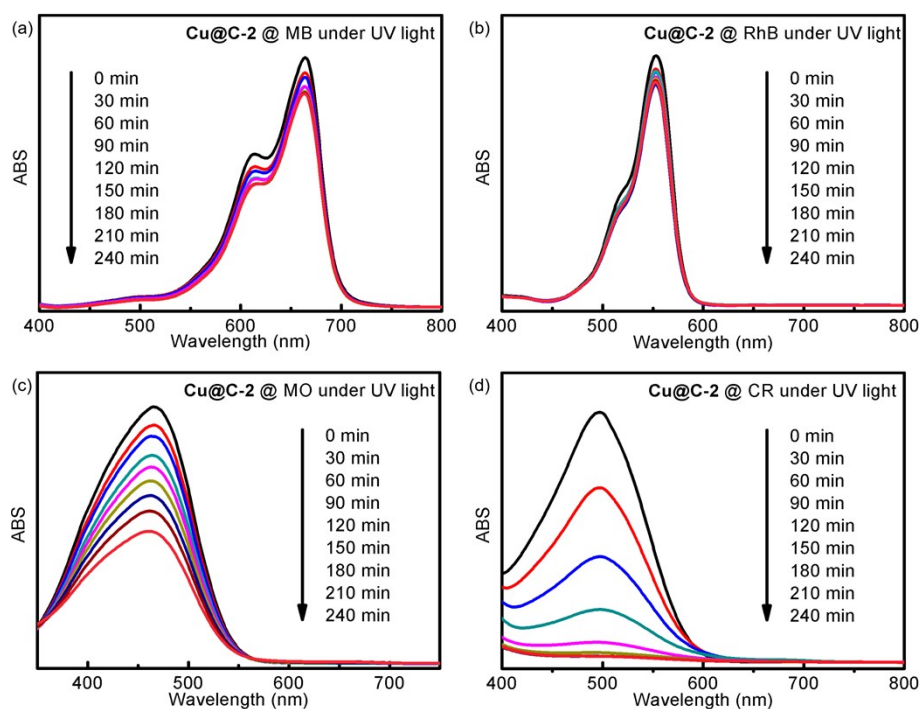

**Fig. S17** UV-vis spectra of MB (a), RhB (b), MO (c) and CR (d) solutions recorded after different photocatalytic degradation times with **Cu@C-2**.

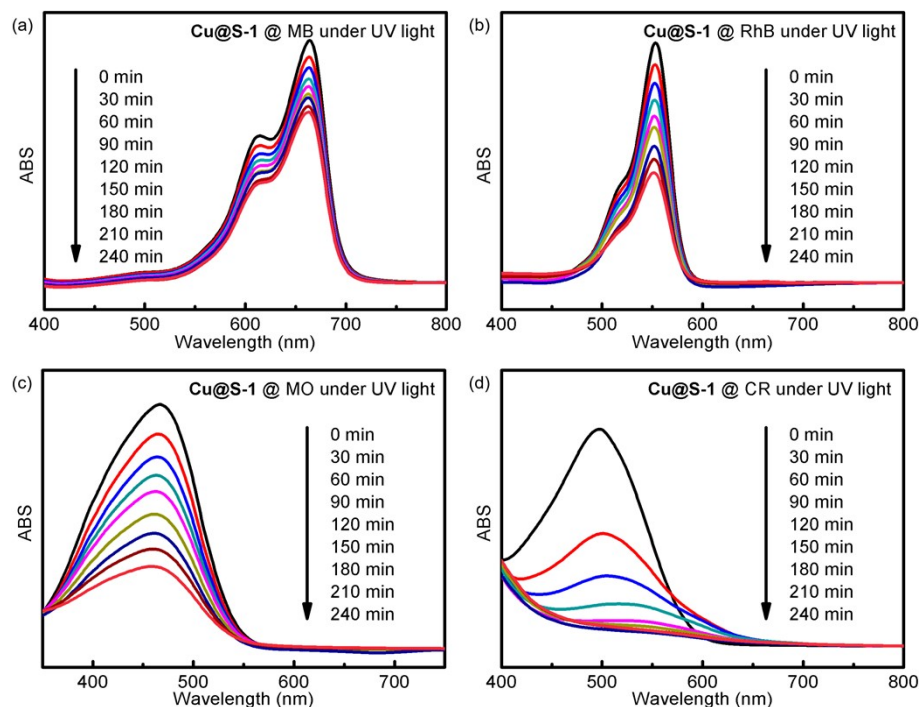

**Fig. S18** UV-vis spectra of MB (a), RhB (b), MO (c) and CR (d) solutions recorded after different photocatalytic degradation times with **Cu@S-1**.

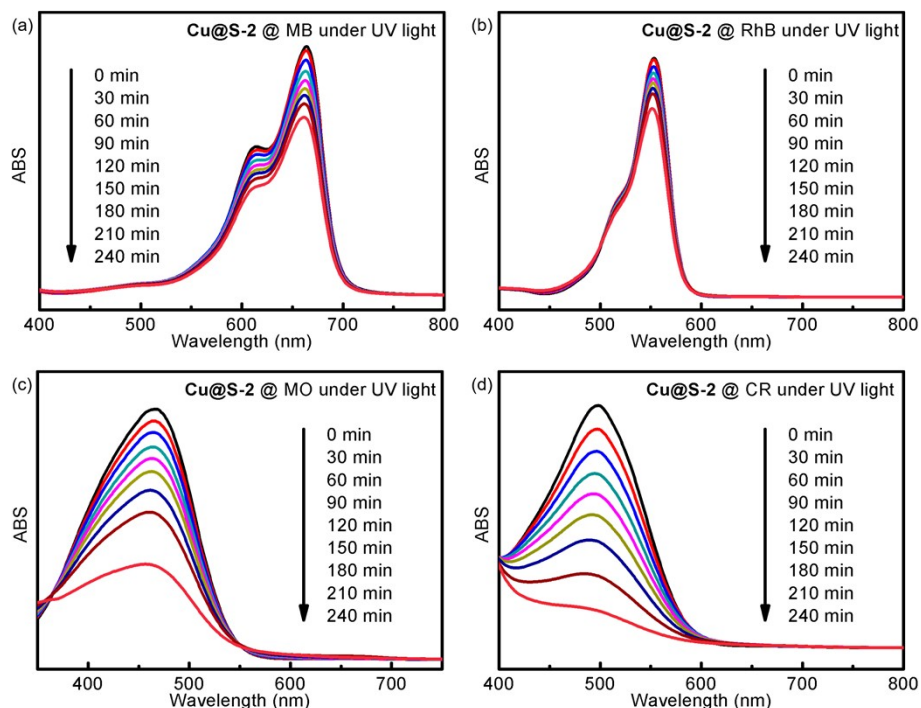

**Fig. S19** UV-vis spectra of MB (a), RhB (b), MO (c) and CR (d) solutions recorded after different photocatalytic degradation times with **Cu@S-2**.

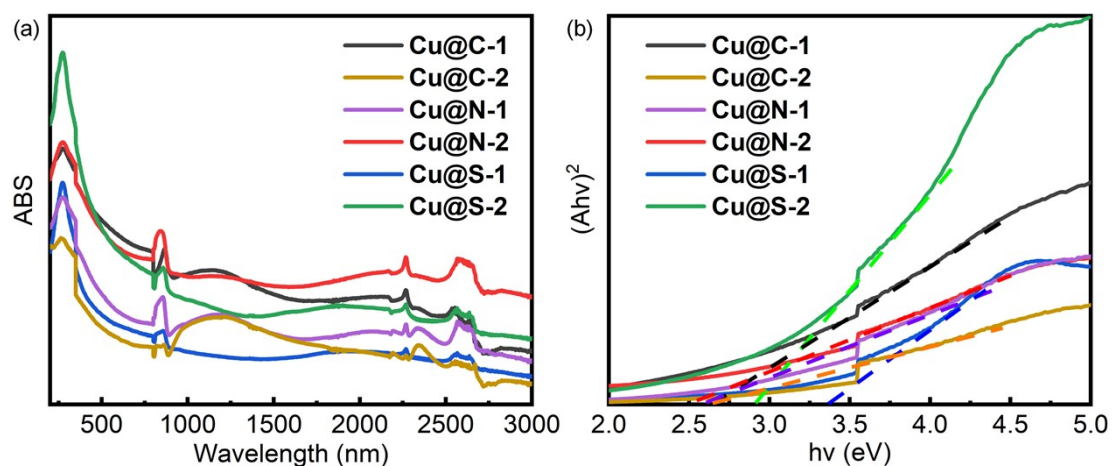

**Fig. S20** UV-vis absorption spectra (a) and bandgap energies (b) of Cu/Cu<sub>2</sub>O heterojunctions.



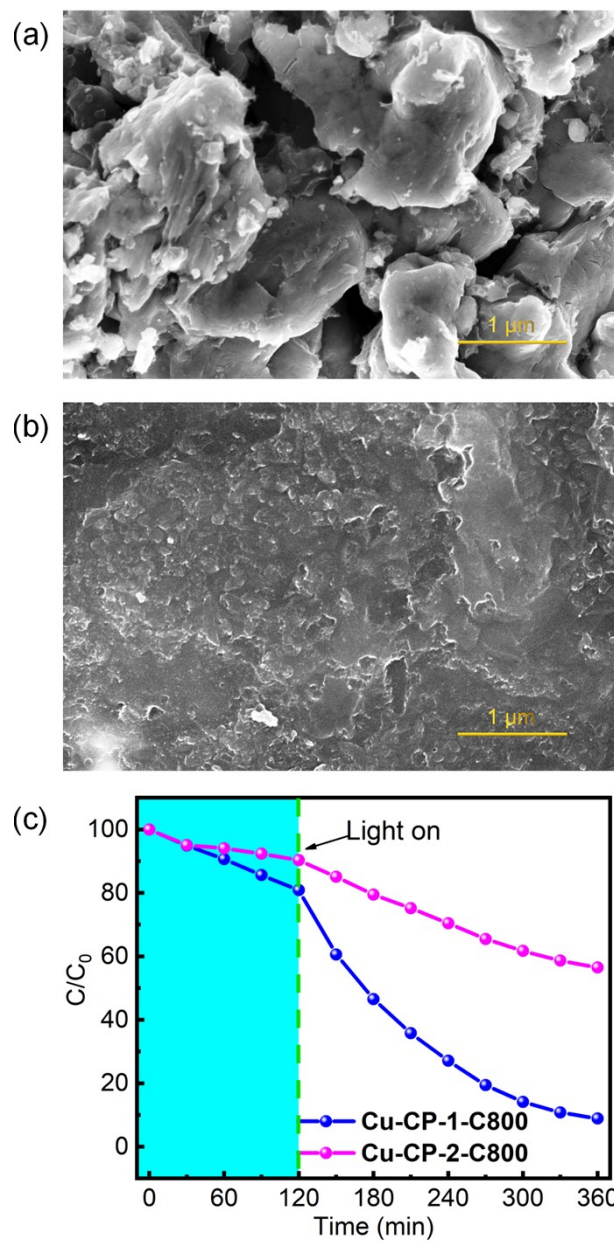

**Fig. S21** Typical SEM images of **Cu-CP-1-C800** (a) and **Cu-CP-2-C800** (b). (c) The photocatalytic degradation rates of CR at different time points during exposure to **Cu-CP-1-C800** and **Cu-CP-2-C800**.



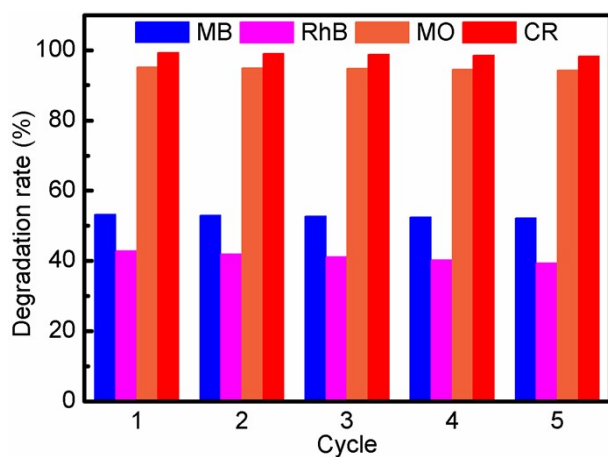

**Fig. S22** The reproducibility of the photocatalyst **Cu@N-2** for dyes.

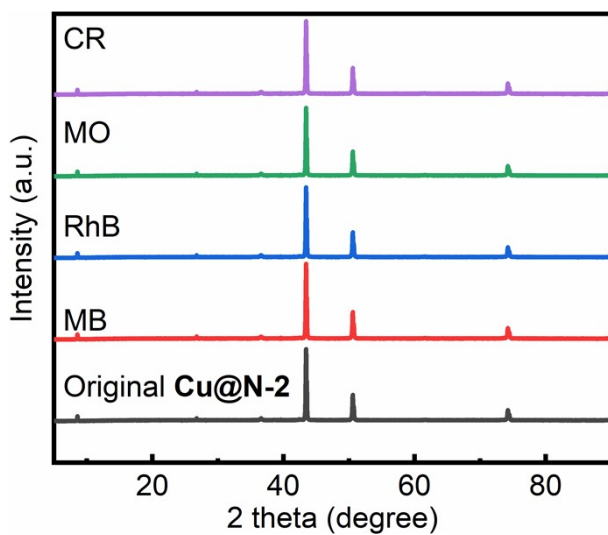

**Fig. S23** The PXRD patterns before and after recycle for five times of the photocatalyst **Cu@N-2** for dyes.
